# Supplementary material for: Botulinum Neurotoxin Type A Directly Affects Sebocytes and Modulates Oleic Acid-Induced Lipogenesis
Source: MDPI journal article supplement (doi:10.3390/toxins14100708), 2022-10-15
Supplement: s1 [file s1]

# Supplementary Materials: Botulinum Neurotoxin Type A Directly Affects Sebocytes and Modulates Oleic Acid-Induced Lipogenesis

Karen Brami-Cherrier, Alex Chernavsky, Hui You, Sergei A. Grando, Amy Brideau-Andersen and Birgitte Sondergaard

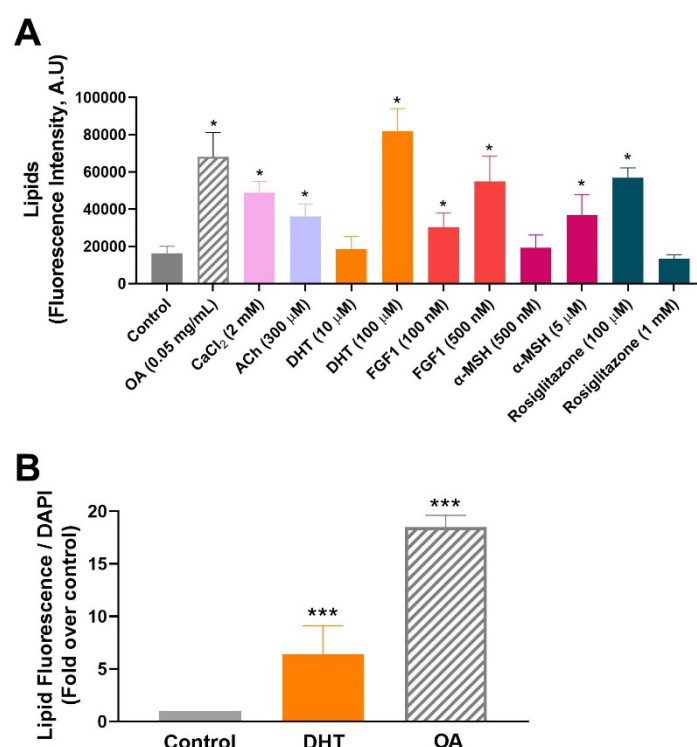

**Figure S1.** Effect of different lipid droplet inducers on cultured SEB-1 cells. **(A)** SEB-1 cells were treated for 24 hours with oleic acid (OA) (0.05 mg/mL), dihydrotestosterone (DHT) (100  $\mu$ M), calcium chloride (CaCl<sub>2</sub>) (2 mM), acetylcholine (ACh) (300  $\mu$ M), fibroblast growth factor 1 (FGF1) (100 nM or 500 nM),  $\alpha$ -melanocyte-stimulating hormone ( $\alpha$ -MSH) (500 nM or 5  $\mu$ M), or rosiglitazone (100  $\mu$ M or 1 mM); intracellular lipids were measured using a lipid droplets fluorescence assay. **(B)** SEB-1 cells treated for 24 hours with DHT (100  $\mu$ M) and OA (0.05 mg/mL). Accumulated lipids were normalized to cell number based on DAPI and shown as fold over control (untreated cells). Data represent mean + SEM. \*  $p < 0.05$ , \*\*\*  $p < 0.001$  vs. control.

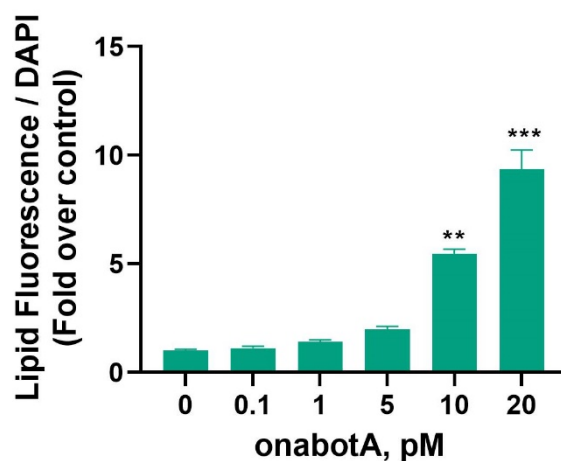

**Figure S2.** Potency of onabotA on naive SEB-1 cell lipogenesis. Dose response of onabotA (0.1–20 pM) showing the amount of intracellular lipids measured using a Nile red fluorescent dye (lipid droplet fluorescence assay) and normalized to the cell number using DAPI staining. Data shown as fold over control (untreated cells). There was a significant effect of onabotA on intracellular lipid accumulation starting at 10 pM. Data represent means from 5 replicates + SEM. \*\*  $p < 0.01$ , \*\*\*  $p < 0.001$  vs. untreated control.

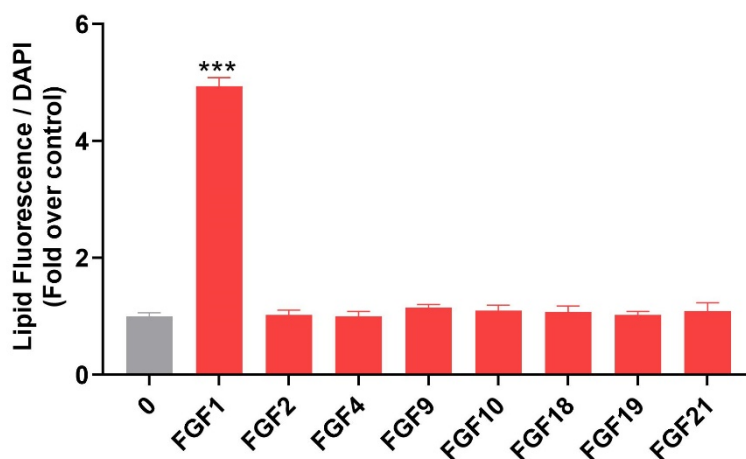

**Figure S3.** Effects of FGFs on lipogenesis. Bar graph representing the lipids/cell increase after treatment with FGF1, FGF2, FGF4, FGF9, FGF10, FGF18, FGF19 or FGF21 (0.5  $\mu$ M). Note that only FGF1 was able to induce a significant increase in lipid production. Data represent mean + SEM. \*\*\*  $p < 0.001$  vs. control (untreated cells).
